# Supplementary material for: Synthesis and antibacterial properties of nanosilver-modified cellulose triacetate membranes for seawater desalination
Source: publisher site journal article supplement (doi:10.3762/bjnano.16.100), 2025-08-19
Supplement: Additional file 1 [file 2190-4286-16-100-S1.pdf]

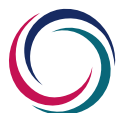

## Supporting Information

for

### **Synthesis and antibacterial properties of nanosilver-modified cellulose triacetate membranes for seawater desalination**

Lei Wang, Shizhe Li, Kexin Xu, Wenjun Li, Ying Li and Gang Liu

*Beilstein J. Nanotechnol.* **2025**, *16*, 1380–1391. doi:10.3762/bjnano.16.100

## Additional experimental data

### Calculation of PDA content in PCTA

According to our measurements, the dimensions of the PCTA membrane are 90 mm × 110 mm, with a thickness of approximately 0.022 mm. The weight of the CTA membrane is 0.223 g. To coat the CTA membrane, 8 mL of a dopamine solution with concentration 2 mg·mL<sup>-1</sup> is used. So the total amount of PDA used for coating is:

$$\text{Total PDA mass} = 8 \text{ mL} \times 2 \text{ mg} \cdot \text{mL}^{-1} = 16 \text{ mg}$$

The mass ratio of PDA to CTA can be calculated as:

$$\text{Mass ratio} = \frac{16 \text{ mg}}{0.233 \text{ g}} \approx 0.068 \text{ mg} \cdot \text{mg}^{-1}$$

The surface area of the CTA membrane is:

$$\text{Surface area} = 90 \text{ mm} \times 110 \text{ mm} = 9900 \text{ mm}^2$$

The amount of PDA per square millimeter is:

$$\text{PDA per mm}^2 = \frac{16 \text{ mg}}{9900 \text{ mm}^2} \approx 0.0016 \text{ mg} \cdot \text{mm}^{-2}$$

Given the extremely low mass ratio (0.068 mg·mg<sup>-1</sup>) and the low surface density (0.00016 mg mm<sup>-2</sup>) of PDA relative to the CTA, the concentration of PDA is below the detection threshold of FTIR spectroscopy.

### Determination of PDA and Ag content in Ag@PCTA

First, the Ag@PCTA membrane was prepared by coating an 8 mL solution of polydopamine (2 mg/mL) onto a CTA membrane with an area of 6800 mm<sup>2</sup> (85 mm × 80 mm) and a mass of 0.2034 g.

The mass ratio of PDA to CTA is calculated as:

$$\text{Mass ratio of PDA to CTA} = \frac{8 \text{ mL} \times 2 \text{ mg} \cdot \text{mL}^{-1}}{0.2034} = 0.079 \text{ mg} \cdot \text{mg}^{-1}$$

Then, the Ag@PCTA membrane was prepared by coating a 5.1 mL solution of Ag[NH<sub>3</sub>]<sub>2</sub>OH (0.002 mol·L<sup>-1</sup>) onto the above PCTA membrane (area = 6800 mm<sup>2</sup>, mass = 0.2034 g).

The mass ratio of silver to CTA is calculated as:

$$\begin{aligned} \text{Mass ratio of Ag to CTA} &= \frac{5.1 \text{ mL} \times 0.002 \text{ mol} \cdot \text{L}^{-1} \times 107.87 \text{ g} \cdot \text{mol}^{-1}}{0.2034} \\ &\approx 0.0054 \text{ mg} \cdot \text{mg}^{-1} \end{aligned}$$

The PDA coating on PCTA and Ag@PCTA, while providing functional groups for further modification, does not introduce distinct IR peaks that are easily distinguishable from the CTA matrix. The low concentration of Ag nanoparticles in Ag@PCTA also results in minimal spectral changes compared to PCTA. The Ag nanoparticles are present in trace amounts, which may not significantly alter the overall FTIR spectrum.

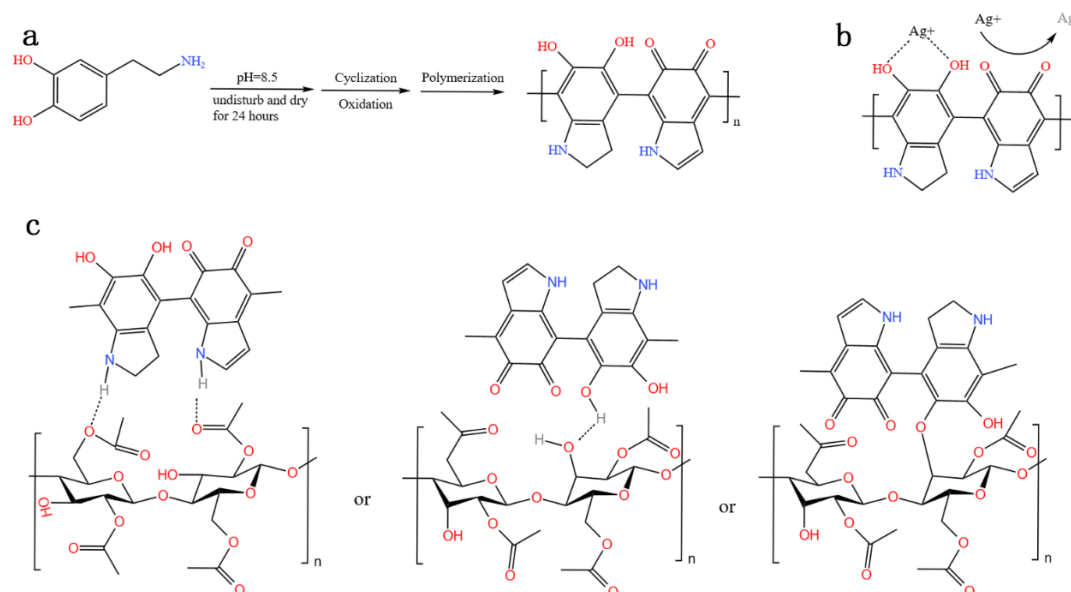

**Figure S1:** (a) The polymerization of dopamine under alkaline conditions, (b) the reduction and fixation of Ag by polydopamine, and (c) interactions between polydopamine and CTA including hydrogen bonding and ether substitution.

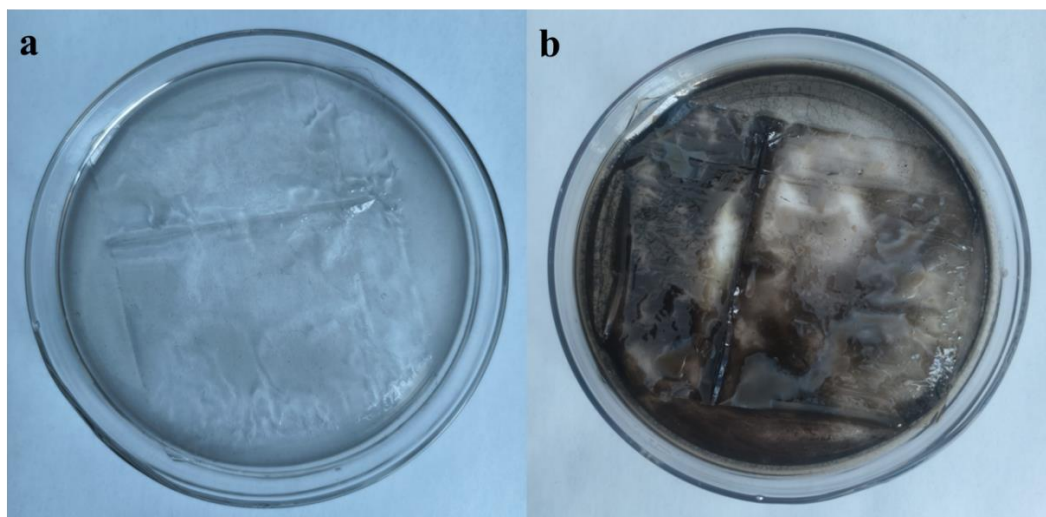

**Figure S2:** (a) Dopamine monomers are added into an alkaline solution in the initial stage, (b) polymerization to PDA after 24 h.

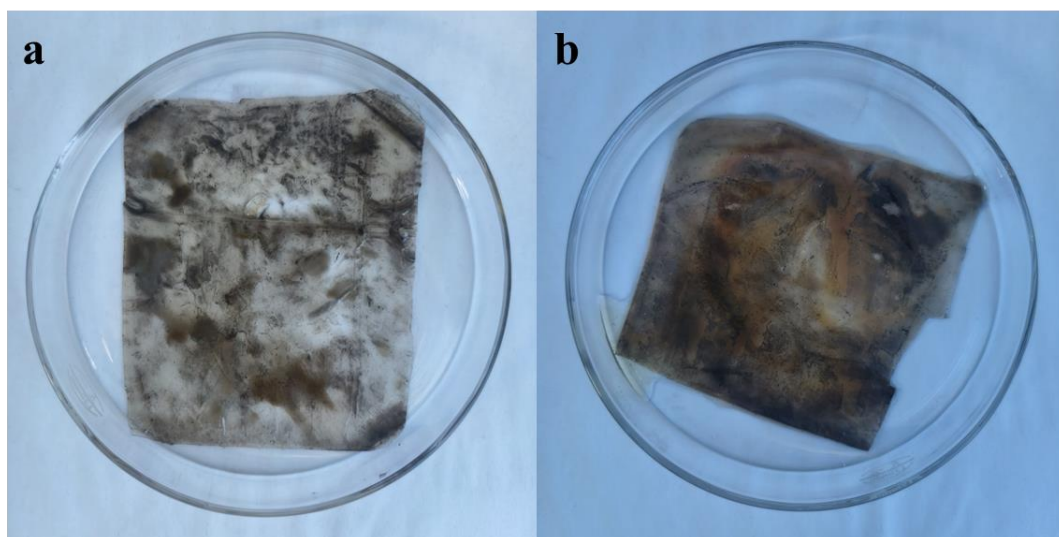

**Figure S3:** PCTA coated with  $\text{Ag}[\text{NH}_3]_2\text{OH}$  (a) and not coated with  $\text{Ag}[\text{NH}_3]_2\text{OH}$  solution (b).

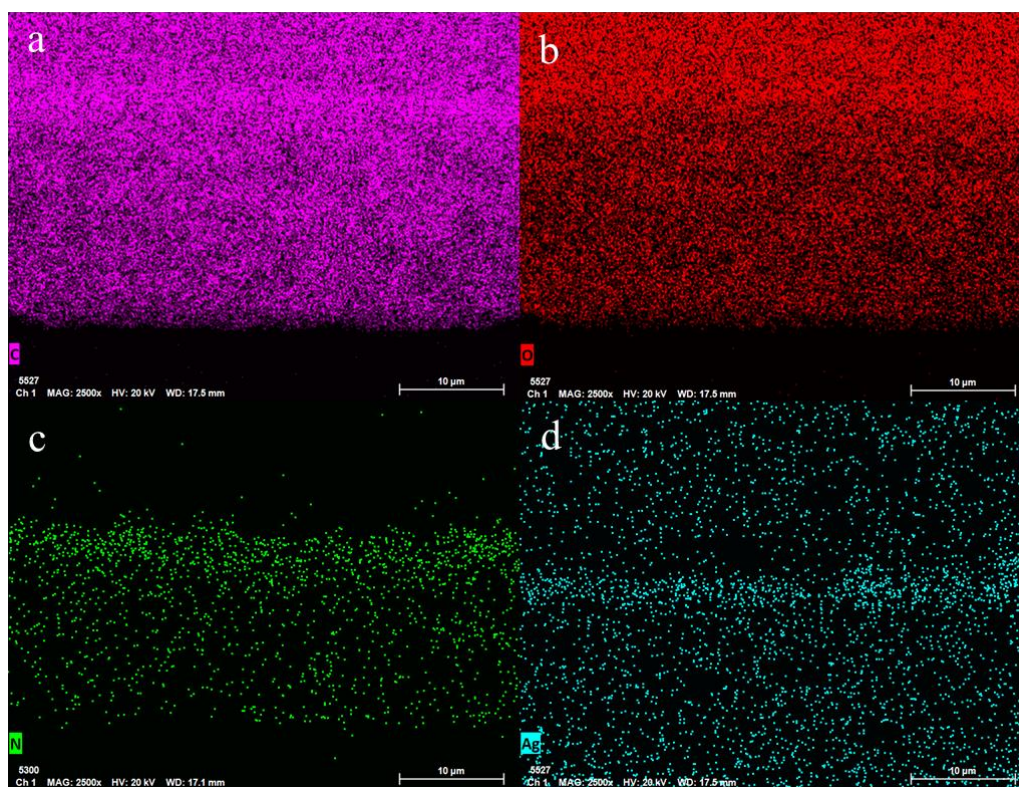

**Figure S4:** EDS elemental mappings show the distribution of elements in different materials: (a, b) C and O in CTA, respectively; (c) N in PCTA; (d) Ag in Ag@PCTA.

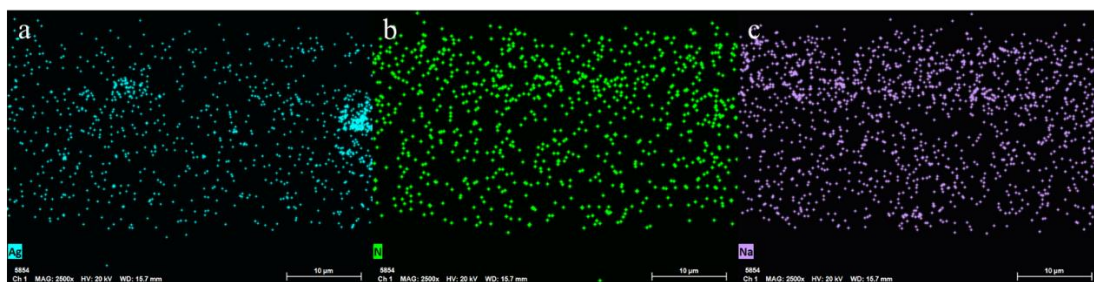

**Figure S5:** EDS of Ag, N, and Na within the layer of Ag@PCTA after desalination.
